# Supplementary material for: Epidemiology of Bone Fracture in Female Trauma Patients Based on Risks of Osteoporosis Assessed using the Osteoporosis Self-Assessment Tool for Asians Score
Source: PubMed Central journal article supplement (PMC5708019; doi:10.3390/ijerph14111380), 2017-11-13
Supplement: ijerph-14-01380-s001.pdf [file ijerph-14-01380-s001.pdf]

Supplemental Tables

**Table S1.** Covariates of high-risk (OSTA < -4) and low-risk (OSTA > -1) patients before and after propensity score matching (1:1 matching via Greedy method).

| Variables                 | <u>Before matching</u>             |                                     |                  |        |          | <u>After matching</u>              |                                     |                 |        |       |
|---------------------------|------------------------------------|-------------------------------------|------------------|--------|----------|------------------------------------|-------------------------------------|-----------------|--------|-------|
|                           | High risk<br>-4>OSTA<br>n=1585 (I) | Low risk<br>OSTA>-1<br>n=3137 (III) | OR (95%CI)       | P      | SD       | High risk<br>-4>OSTA<br>n=1268 (I) | Low risk<br>OSTA>-1<br>n=1268 (III) | OR (95%CI)      | P      | SD    |
| <b>Mechanism, n (%)</b>   |                                    |                                     |                  |        |          |                                    |                                     |                 |        |       |
| <b>Motor vehicle</b>      | 9 (0.6)                            | 70 (2.2)                            | 0.3 (0.13-0.50)  | <0.001 | -14.20%  | 9 (0.7)                            | 9 (0.7)                             | 0.4 (0.21-0.62) | <0.001 | 0.00% |
| <b>Motorcycle</b>         | 133 (8.4)                          | 1659 (52.9)                         | 0.1 (0.07-0.10)  | <0.001 | -110.20% | 133 (10.5)                         | 133 (10.5)                          | 0.5 (0.44-0.56) | <0.001 | 0.00% |
| <b>Bicycle</b>            | 74 (4.7)                           | 102 (3.3)                           | 1.5 (1.07-1.98)  | 0.015  | 7.27%    | 74 (5.8)                           | 74 (5.8)                            | 1.6 (1.23-2.15) | 0.001  | 0.00% |
| <b>Pedestrian</b>         | 56 (3.5)                           | 70 (2.2)                            | 1.6 (1.12-2.29)  | 0.009  | 7.79%    | 56 (4.4)                           | 56 (4.4)                            | 1.4 (0.96-1.94) | 0.079  | 0.00% |
| <b>Fall</b>               | 1277 (80.6)                        | 960 (30.6)                          | 9.4 (8.13-10.88) | <0.001 | 116.33%  | 960 (75.7)                         | 960 (75.7)                          | 2.4 (2.10-2.65) | <0.001 | 0.00% |
| <b>Penetrating injury</b> | 7 (0.4)                            | 78 (2.5)                            | 0.2 (0.08-0.38)  | <0.001 | -17.09%  | 7 (0.6)                            | 7 (0.6)                             | 0.5 (0.30-0.76) | 0.001  | 0.00% |
| <b>Struck by/against</b>  | 29 (1.8)                           | 198 (6.3)                           | 0.3 (0.19-0.41)  | <0.001 | -22.83%  | 29 (2.3)                           | 29 (2.3)                            | 0.4 (0.33-0.60) | <0.001 | 0.00% |

CI = confidence interval; OR = Odds ratio; OSTA = Osteoporosis Self-Assessment Tool for Asians; SD = Standardized Difference.

**Table S2.** Covariates of medium-risk (-1 ≥ OSTA ≥ -4) and low-risk (OSTA > -1) patients before and after propensity score matching (1:1 matching via Greedy method).

| Variables                 | <u>Before matching</u>             |                                     |                 |        |         | <u>After matching</u>              |                                     |                 |        |       |
|---------------------------|------------------------------------|-------------------------------------|-----------------|--------|---------|------------------------------------|-------------------------------------|-----------------|--------|-------|
|                           | High risk<br>-4>OSTA<br>n=1585 (I) | Low risk<br>OSTA>-1<br>n=3137 (III) | OR (95%CI)      | P      | SD      | High risk<br>-4>OSTA<br>n=1268 (I) | Low risk<br>OSTA>-1<br>n=1268 (III) | OR (95%CI)      | P      | SD    |
| <b>Mechanism, n (%)</b>   |                                    |                                     |                 |        |         |                                    |                                     |                 |        |       |
| <b>Motor vehicle</b>      | 16 (0.8)                           | 70 (2.2)                            | 0.4 (0.21-0.62) | <0.001 | -11.67% | 16 (0.8)                           | 16 (0.8)                            | 0.4 (0.21-0.62) | <0.001 | 0.00% |
| <b>Motorcycle</b>         | 712 (35.9)                         | 1659 (52.9)                         | 0.5 (0.44-0.56) | <0.001 | -34.76% | 712 (36.9)                         | 712 (36.9)                          | 0.5 (0.44-0.56) | <0.001 | 0.00% |
| <b>Bicycle</b>            | 103 (5.2)                          | 102 (3.3)                           | 1.6 (1.23-2.15) | 0.001  | 9.65%   | 102 (5.3)                          | 102 (5.3)                           | 1.6 (1.23-2.15) | 0.001  | 0.00% |
| <b>Pedestrian</b>         | 60 (3.0)                           | 70 (2.2)                            | 1.4 (0.96-1.94) | 0.079  | 4.95%   | 60 (3.1)                           | 60 (3.1)                            | 1.4 (0.96-1.94) | 0.079  | 0.00% |
| <b>Fall</b>               | 1012 (51.0)                        | 960 (30.6)                          | 2.4 (2.10-2.65) | <0.001 | 42.39%  | 960 (49.7)                         | 960 (49.7)                          | 2.4 (2.10-2.65) | <0.001 | 0.00% |
| <b>Penetrating injury</b> | 24 (1.2)                           | 78 (2.5)                            | 0.5 (0.30-0.76) | 0.001  | -9.50%  | 7 (0.6)                            | 7 (0.6)                             | 0.5 (0.30-0.76) | 0.001  | 0.00% |
| <b>Struck by/against</b>  | 58 (2.9)                           | 198 (6.3)                           | 0.4 (0.33-0.60) | <0.001 | -16.21% | 29 (2.3)                           | 29 (2.3)                            | 0.4 (0.33-0.60) | <0.001 | 0.00% |

CI = confidence interval; OR = Odds ratio; OSTA = Osteoporosis Self-Assessment Tool for Asians; SD = Standardized Difference.
